# Supplementary material
Source: PubMed Central journal article supplement (PMC8092547)
Supplement: AAC.01063-20-s0001.pdf [file AAC.01063-20-s0001.pdf]

## Supporting Information

### **Multiple SNPs detection for antimalarial pyrimethamine resistance via allele-specific PCR coupled with gold nanoparticles-based lateral flow biosensor**

Tingting Jiang<sup>1,\*</sup>, Yan Huang<sup>2,\*</sup>, Weijia Cheng<sup>1</sup>, Yifei Sun<sup>1</sup>, Wei Wei<sup>2</sup>, Kai Wu<sup>3</sup>, Chen Shen<sup>1</sup>, Xiaolong Fu<sup>1</sup>, Haifeng Dong<sup>2,#</sup>, and Jian Li<sup>1,#</sup>

<sup>1</sup> Department of Human Parasitology, School of Basic Medical Sciences; Department of Infectious Diseases, Renmin Hospital, Hubei University of Medicine, Shiyan 442000, China

<sup>2</sup> Beijing Key Laboratory for Bioengineering and Sensing Technology, Research Centre for Bioengineering and Sensing Technology, School of Chemistry and Biological Engineering, University of Science & Technology Beijing, 30 Xueyuan Road, P.R. China

<sup>3</sup> Department of Schistosomiasis and Endemic Diseases, Wuhan City Center for Disease Prevention and Control, Wuhan 430024, China

**Table S1** Unlabelled primer candidates utilized for single nuclear polymorphisms detection in *pdfhfr* gene.

| Name                 |    | Sequences and modifications (5' to 3') | Description            |
|----------------------|----|----------------------------------------|------------------------|
| Pfdhfr-N51I_Rev      |    | GCTTTCCCAGCTTGTCTTCCC                  | Common primer          |
| Pfdhfr-N51_Fwd1_WT   | W  | AGGAGTATTACCATGGAAATGT*A*A             | Allele specific primer |
| Pfdhfr-51I_Fwd1_Mut  | M  | AGGAGTATTACCATGGAAATGT*A*T             |                        |
| Pfdhfr-59_108_Fwd    |    | GATGGAACAAGTCTGCGACGT                  | Common primer          |
| Pfdhfr-C59_Rev1_WT   | W1 | TCATTACATATGTTGTAAGTGCAC*A             | Allele specific primer |
| Pfdhfr-C59_Rev2_WT   | W2 | TCATTACATATGTTGTAAGTGCAC*A             |                        |
| Pfdhfr-C59_Rev3_WT   | W3 | TCATTACATATGTTGTAAGTGCAC*A             |                        |
| Pfdhfr-C59_Rev4_WT   | W4 | TCATTACATATGTTGTAAGTGCAC*A             |                        |
| Pfdhfr-59R_Rev1_Mut  | M1 | TCATTACATATGTTGTAAGTGCAC*A             |                        |
| Pfdhfr-59R_Rev2_Mut  | M2 | TCATTACATATGTTGTAAGTGCAC*A             |                        |
| Pfdhfr-59R_Rev3_Mut  | M3 | TCATTACATATGTTGTAAGTGCAC*A             |                        |
| Pfdhfr-59R_Rev4_Mut  | M4 | TCATTACATATGTTGTAAGTGCAC*A             |                        |
| Pfdhfr-59R_Rev5_Mut  | M5 | TCATTACATATGTTGTAAGTGCAC*A             |                        |
| Pfdhfr-59R_Rev6_Mut  | M6 | TCATTACATATGTTGTAAGTGCAC*A             |                        |
| Pfdhfr-S108_Rev1_WT  | W1 | TTTTGGAATGCTTTCCCTG*C                  |                        |
| Pfdhfr-S108_Rev2_WT  | W2 | TTTTGGAATGCTTTCCCTG*C                  |                        |
| Pfdhfr-S108_Rev3_WT  | W3 | TTTTGGAATGCTTTCCCTG*C                  |                        |
| Pfdhfr-108N_Rev1_Mut | M1 | TTTTGGAATGCTTTCCCTG*T                  | Allele specific primer |
| Pfdhfr-108N_Rev2_Mut | M2 | TTTTGGAATGCTTTCCCTG*T                  |                        |
| Pfdhfr-108N_Rev3_Mut | M3 | TTTTGGAATGCTTTCCCTG*T                  |                        |

**Note:** Artificial mismatches are in bold. \* indicates the location of phosphorothiate modification. Fwd and Rev stand for forward and reverse, respectively. WT and Mut represent wild type and mutation, respectively. The same common primer utilized when used in allele-specific amplification C59R and S108N of Pfdhfr.

**Table S2** Comparison between Nested PCR with sequencing and AS-PCR-LFA for single nuclear polymorphisms detection in *pfdhfr* gene with clinical isolates of *Plasmodium falciparum*.

| Group     | Sample No. | Nested PCR with sequencing |     |     | AS-PCR-LFA |     |     |
|-----------|------------|----------------------------|-----|-----|------------|-----|-----|
|           |            | 51                         | 59  | 108 | 51         | 59  | 108 |
| Low       | WK-Pf-21   | I                          | R   | S   | I          | R   | S   |
|           | WK-Pf-22   | I                          | R   | S   | I          | R   | S   |
|           | WK-Pf-42   | I                          | R   | S   | I          | R   | S   |
|           | WK-Pf-43   | I                          | R   | S   | Neg        | Neg | Neg |
|           | WK-Pf-47   | I                          | R   | S   | I          | R   | S   |
|           | WK-Pf-56   | I                          | R   | S   | I          | R   | S   |
|           | WK-Pf-75   | N                          | R   | S   | N          | R   | S   |
|           | WK-Pf-83   | I                          | R   | S   | I          | R   | S   |
|           | WK-Pf-107  | I                          | R   | S   | I          | R   | S   |
|           | WK-Pf-111  | I                          | R   | S   | I          | R   | S   |
|           | WK-Pf-115  | I                          | R   | S   | I          | R   | S   |
|           | WK-Pf-129  | I                          | R   | S   | I          | R   | S   |
|           | WK-Pf-134  | I                          | R   | S   | I          | R   | S   |
|           | WK-Pf-151  | I                          | R   | S   | I          | R   | S   |
|           | WK-Pf-165  | I                          | R   | S   | I          | R   | S   |
|           | WK-Pf-166  | I                          | R   | S   | I          | R   | S   |
|           | WK-Pf-176  | I                          | R   | S   | I          | R   | S   |
|           | WK-Pf-185  | I                          | R   | S   | I          | R   | S   |
|           | WK-Pf-195  | I                          | R   | S   | I          | R   | S   |
|           | WK-Pf-202  | I                          | R   | S   | I          | R   | S   |
|           | WK-Pf-218  | I                          | R   | S   | I          | R   | S   |
|           | WK-Pf-219  | I                          | R   | S   | Neg        | Neg | Neg |
| WK-Pf-228 | I          | R                          | S   | I   | R          | S   |     |
| Middle    | WK-Pf-8    | I                          | R   | S   | I          | R   | S   |
|           | WK-Pf-10   | I                          | R   | S   | I          | R   | S   |
|           | WK-Pf-17   | I                          | R   | S   | I          | R   | S   |
|           | WK-Pf-29   | I                          | R   | S   | I          | R   | S   |
|           | WK-Pf-32   | I                          | R   | S   | I          | R   | S   |
|           | WK-Pf-34   | I                          | R   | S   | I          | R   | S   |
|           | WK-Pf-41   | I                          | R   | S   | I          | R   | S   |
|           | WK-Pf-44   | I                          | R   | S   | I          | R   | S   |
|           | WK-Pf-53   | I                          | R   | S   | I          | R   | S   |
|           | WK-Pf-57   | I                          | R   | S   | I          | R   | S   |
|           | WK-Pf-90   | I                          | R   | S   | I          | R   | S   |
|           | WK-Pf-95   | I                          | C/R | S   | I          | C/R | S   |
| WK-Pf-106 | I          | R                          | S   | I   | R          | S   |     |

|               |     |     |   |     |     |   |
|---------------|-----|-----|---|-----|-----|---|
| WK-Pf-108     | I   | R   | S | I   | R   | S |
| WK-Pf-114     | I   | R   | S | I   | R   | S |
| WK-Pf-120     | I   | R   | S | I   | R   | S |
| WK-Pf-128     | I   | R   | S | I   | R   | S |
| WK-Pf-135     | N   | R   | S | N   | R   | S |
| WK-Pf-148     | N   | C   | N | N   | C   | N |
| WK-Pf-162     | I   | R   | S | I   | R   | S |
| WK-Pf-169     | I   | R   | S | I   | R   | S |
| WK-Pf-178     | I   | R   | S | I   | R   | S |
| WK-Pf-181     | N   | R   | S | N   | R   | S |
| WK-Pf-182     | I   | R   | S | I   | R   | S |
| WK-Pf-183     | I   | R   | S | I   | R   | S |
| WK-Pf-193     | I   | R   | S | I   | R   | S |
| WK-Pf-196     | I   | R   | S | I   | R   | S |
| WK-Pf-223     | N   | C   | N | N   | C   | N |
| WK-Pf-5       | N/I | R   | S | N/I | R   | S |
| WK-Pf-33      | I   | R   | S | I   | C/R | S |
| WK-Pf-65      | I   | R   | S | I   | R   | S |
| WK-Pf-92      | I   | R   | S | I   | R   | S |
| WK-Pf-104     | I   | R   | S | I   | R   | S |
| WK-Pf-108     | I   | R   | S | I   | R   | S |
| WK-Pf-126     | I   | R   | S | I   | R   | S |
| WK-Pf-156     | I   | R   | S | I   | R   | S |
| WK-Pf-175     | I   | R   | S | I   | R   | S |
| WK-Pf-7       | I   | R   | S | I   | R   | S |
| WK-Pf-9       | I   | R   | S | I   | R   | S |
| WK-Pf-11      | I   | R   | S | I   | R   | S |
| WK-Pf-12      | I   | R   | S | I   | R   | S |
| WK-Pf-14      | N   | R   | S | N   | R   | S |
| WK-Pf-18      | I   | R   | S | I   | R   | S |
| WK-Pf-25      | I   | R   | S | I   | R   | S |
| WK-Pf-28      | I   | R   | S | I   | R   | S |
| WK-Pf-31      | I   | R   | S | I   | R   | S |
| High WK-Pf-36 | I   | R   | S | I   | R   | S |
| WK-Pf-38      | I   | R   | S | I   | R   | S |
| WK-Pf-39      | I   | C/R | S | I   | C/R | S |
| WK-Pf-45      | I   | T   | S | I   | T   | S |
| WK-Pf-48      | I   | R   | S | I   | R   | S |
| WK-Pf-52      | I   | C/R | S | I   | C/R | S |
| WK-Pf-59      | I   | C/R | S | I   | C/R | S |
| WK-Pf-70      | I   | R   | S | I   | C/R | S |
| WK-Pf-76      | I   | R   | S | I   | R   | S |
| WK-Pf-77      | I   | R   | S | I   | R   | S |

|           |   |   |   |   |   |   |
|-----------|---|---|---|---|---|---|
| WK-Pf-87  | I | R | S | I | R | S |
| WK-Pf-91  | I | R | S | I | R | S |
| WK-Pf-93  | I | R | S | I | R | S |
| WK-Pf-94  | I | R | S | I | R | S |
| WK-Pf-97  | I | R | S | I | R | S |
| WK-Pf-98  | I | R | S | I | R | S |
| WK-Pf-99  | I | R | S | I | R | S |
| WK-Pf-101 | I | R | S | I | R | S |
| WK-Pf-102 | I | R | S | I | R | S |
| WK-Pf-121 | I | R | S | I | R | S |
| WK-Pf-124 | I | R | S | I | R | S |
| WK-Pf-189 | I | R | S | I | R | S |
| WK-Pf-192 | I | R | S | I | R | S |
| WK-Pf-199 | I | R | S | I | R | S |
| WK-Pf-211 | I | R | S | I | R | S |
| WK-Pf-226 | I | C | S | I | C | S |
| WK-Pf-230 | I | R | S | I | R | S |
| WK-Pf-231 | N | C | N | N | C | N |
| WK-Pf-233 | N | C | N | N | C | N |

---

Note: Neg indicate negative.

**Table S3** Methodological comparison of AS-PCR-LFA and nested PCR with sequencing in different parasitemia.

| Method                     | AS-PCR-LFA |                                  |     |    |     |     | Sensitivity (%) | Specificity (%) | False negative (%) | False positive (%) |
|----------------------------|------------|----------------------------------|-----|----|-----|-----|-----------------|-----------------|--------------------|--------------------|
|                            | Genotype   | Parasitemia (parasites/ $\mu$ l) | No. | WT | Mut | Mix |                 |                 |                    |                    |
| Nested PCR with sequencing | N51I       | Low ( $\leq$ 1,000)              | 23  | 1  | 20  | 0   | 91.30           | 100             | 8.70               | 0                  |
|                            |            | Middle (1,001-9,999)             | 37  | 4  | 32  | 1   | 100             | 100             | 0                  | 0                  |
|                            |            | High ( $\geq$ 10,000)            | 38  | 3  | 35  | 0   | 100             | 100             | 0                  | 0                  |
|                            |            | <b>Subtotal</b>                  | 98  | 8  | 87  | 1   | 97.96           | 100             | 2.04               | 0                  |
|                            | C59R       | Low ( $\leq$ 1,000)              | 23  | 0  | 21  | 0   | 91.30           | 100             | 8.70               | 0                  |
|                            |            | Middle (1,001-9,999)             | 37  | 2  | 33  | 1   | 100             | 97.30           | 0                  | 2.70               |
|                            |            | High ( $\geq$ 10,000)            | 38  | 4  | 30  | 3   | 100             | 97.37           | 0                  | 2.63               |
|                            |            | <b>Subtotal</b>                  | 98  | 6  | 84  | 4   | 97.96           | 95.92           | 2.04               | 4.08               |
|                            | S108N      | Low ( $\leq$ 1,000)              | 23  | 0  | 21  | 0   | 91.30           | 100             | 8.70               | 0                  |
|                            |            | Middle (1,001-9,999)             | 37  | 2  | 35  | 0   | 100             | 100             | 0                  | 0                  |
|                            |            | High ( $\geq$ 10,000)            | 38  | 2  | 36  | 0   | 100             | 100             | 0                  | 0                  |
|                            |            | <b>Subtotal</b>                  | 98  | 4  | 92  | 0   | 97.96           | 100             | 2.04               | 0                  |

**Note:** WT, Mut and Mix represent wild type, mutation and mixed type respectively.

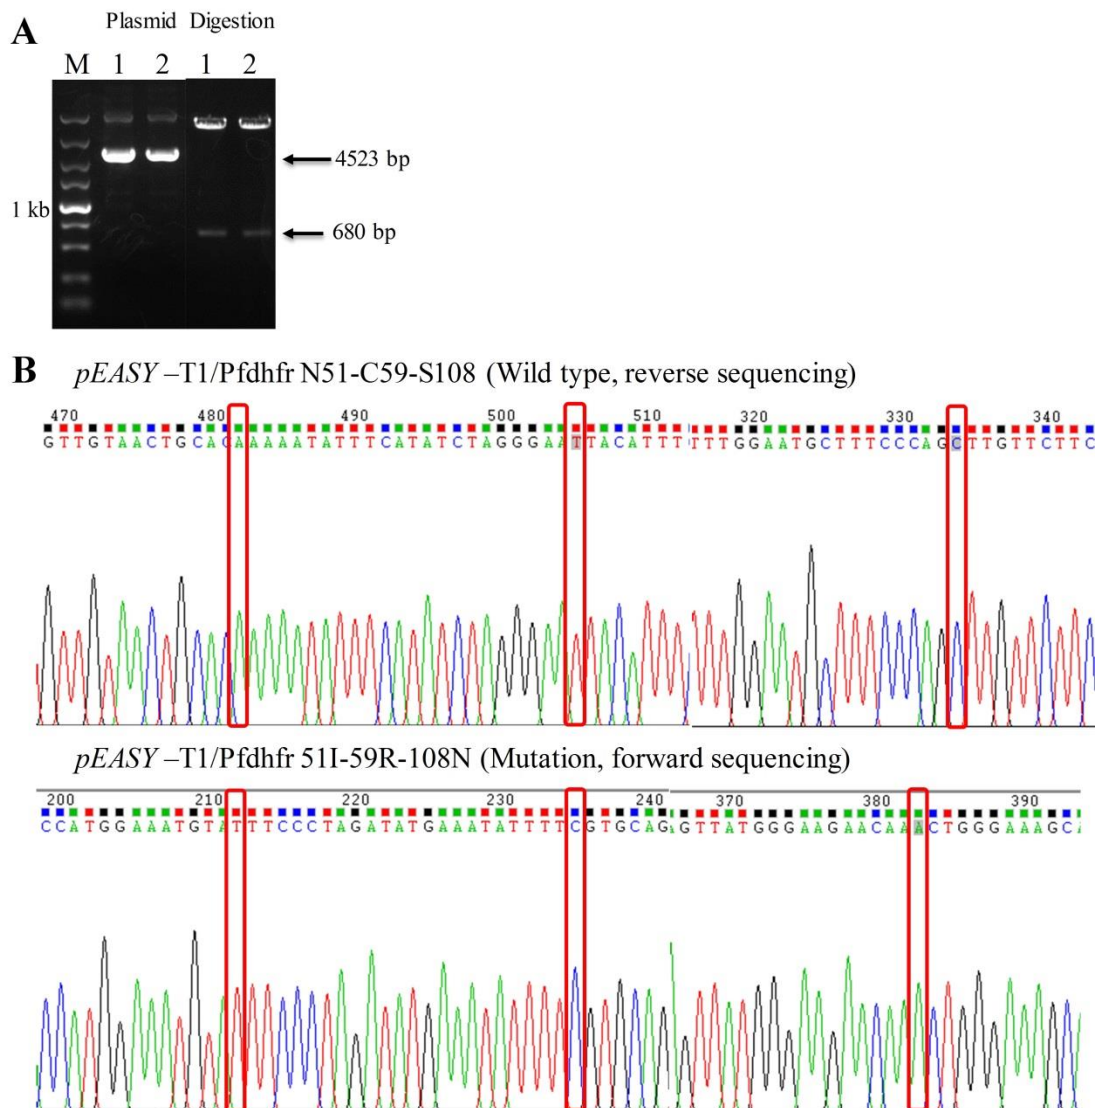

**Figure S1** Recombinant plasmids construction and identification. (A) Double digestion with restriction endonuclease *BamH* I and *Xho* I. M represent DL5000 DNA ladder (100 bp, 250 bp, 500 bp, 750 bp, 1 kb, 2 kb, 3 kb, 4 kb and 5 kb). 1, 2, represent recombinant plasmid of *pEASY-T1/Pfdhfr N51-C59-S108* (wild type), *pEASY-T1/Pfdhfr 51I-59R-108N* (mutation), respectively. (B) DNA sequencing.

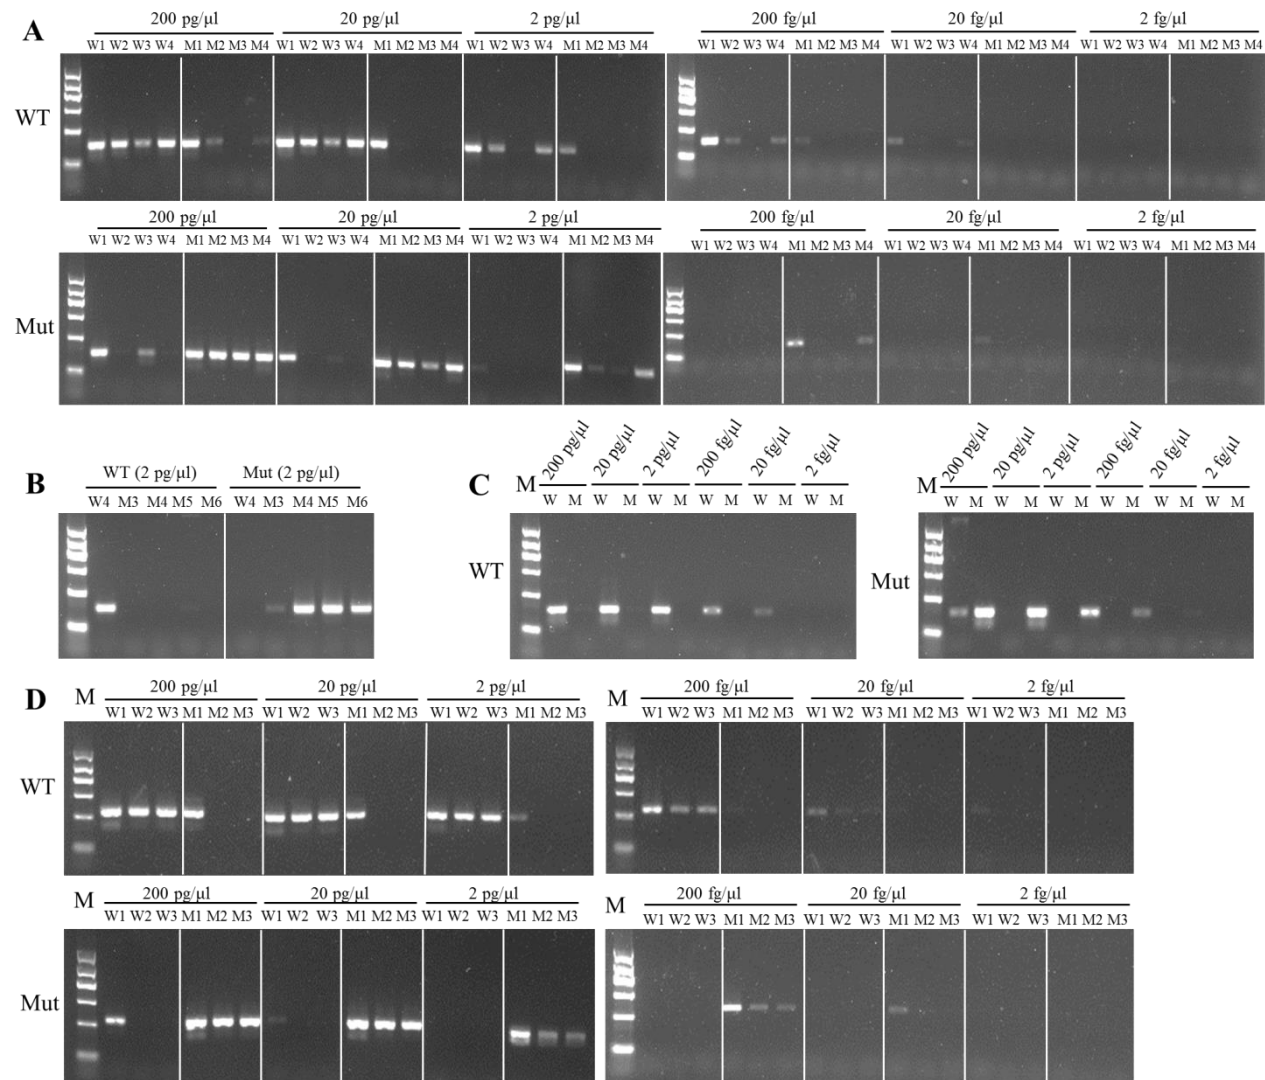

**FIG S2** Primer screening for single nucleotide polymorphisms (SNPs) detection in *pf dhfr* gene. (A) The distinguishing primer for wild type and mutations at positions C59R of Pfdhfr; (B) Confirmation of mismatch position and base type for allele-specific primer (take Pfdhfr C59R as an example) provided by the agarose gel electrophoresis; (C) The distinguishing primer for wild type and mutations at positions N51I of Pfdhfr; (D) The distinguishing primer for wild type and mutations at positions S108N of Pfdhfr. WT and MUT represent wild type template and mutation template, respectively. For the final concentrations of serial dilutions of plasmid pEASY-T1/Pfdhfr in the PCR reaction system (20 μl), there were from 200 pg/μl to 2 fg/μl.



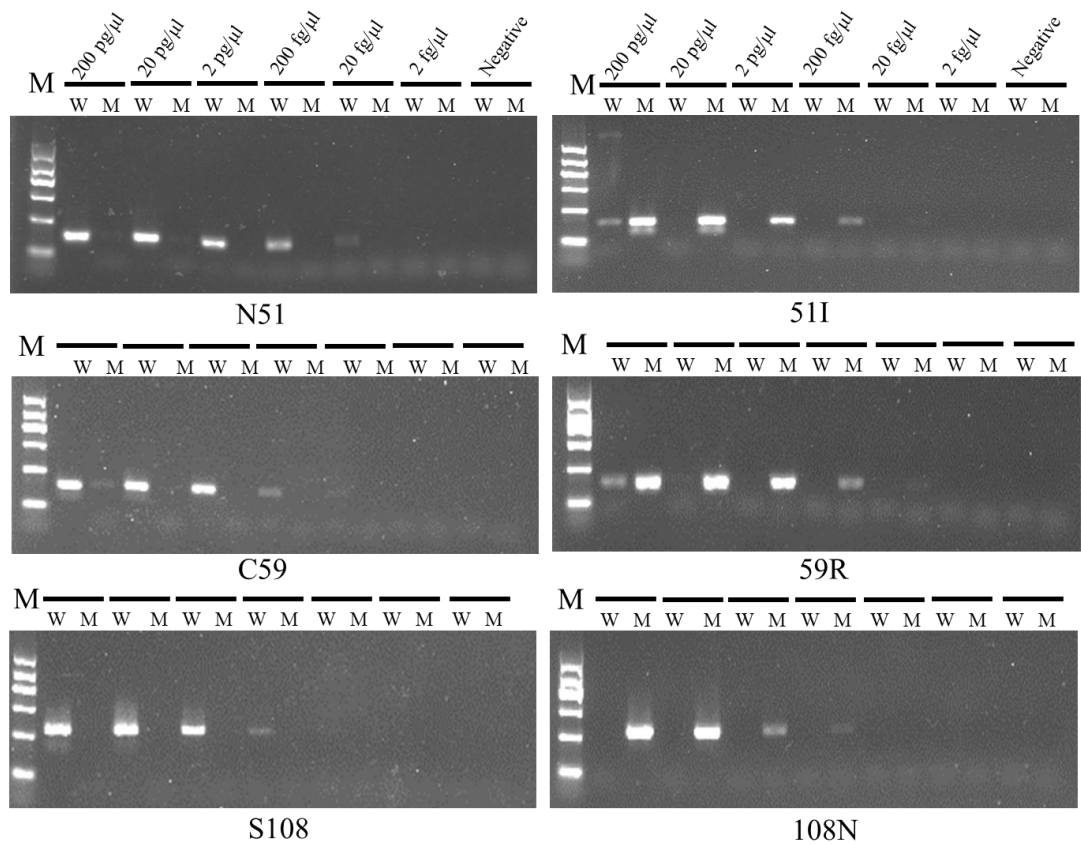

**FIG S3** Sensitivity and specificity evaluation of selected primers for *pdfhfr* gene at different concentrations of plasmid by agarose gel electrophoresis. W and M on the sample lanes represent wild type and mutation primer, respectively. For the final concentrations of serial dilutions of plasmid pEASY-T1/Pfdhfr in the PCR reaction system (20 μl), there were from 200 pg/μl to 2 fg/μl.

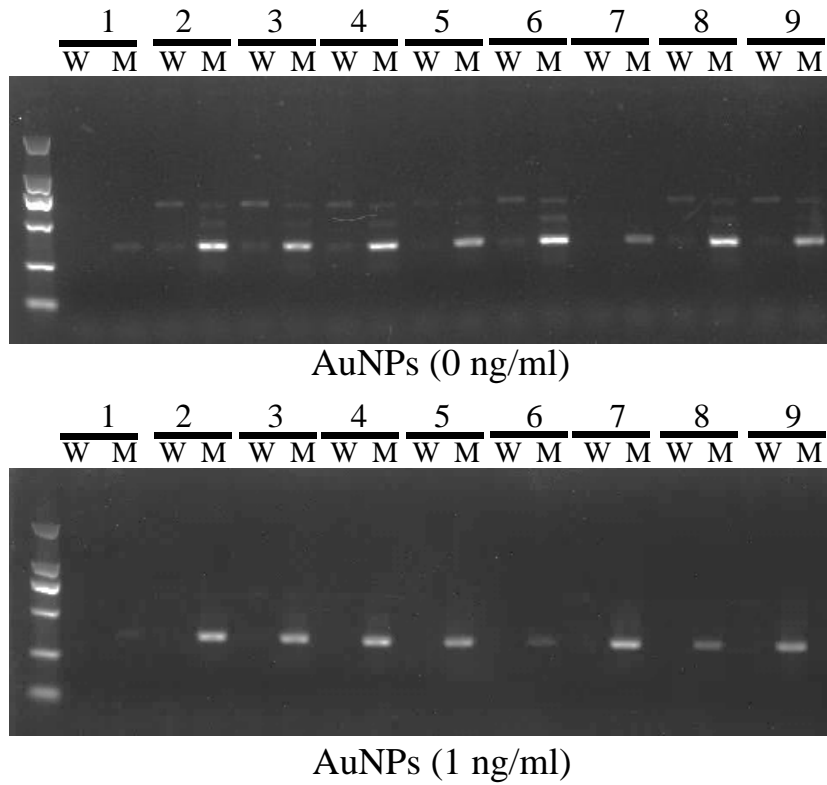

**Figure S4** Agarose gel electrophoresis showing the AuNPs-enhanced allele-specific PCR strategy. Note: The 1-9 represent blood samples from falciparum malaria patients; W, M stands for optimized primer Pfdhfr-S108\_Rev3\_WT and Pfdhfr-108N\_Rev3\_Mut, respectively. W and M on the sample lane represent wild type and mutation, respectively.

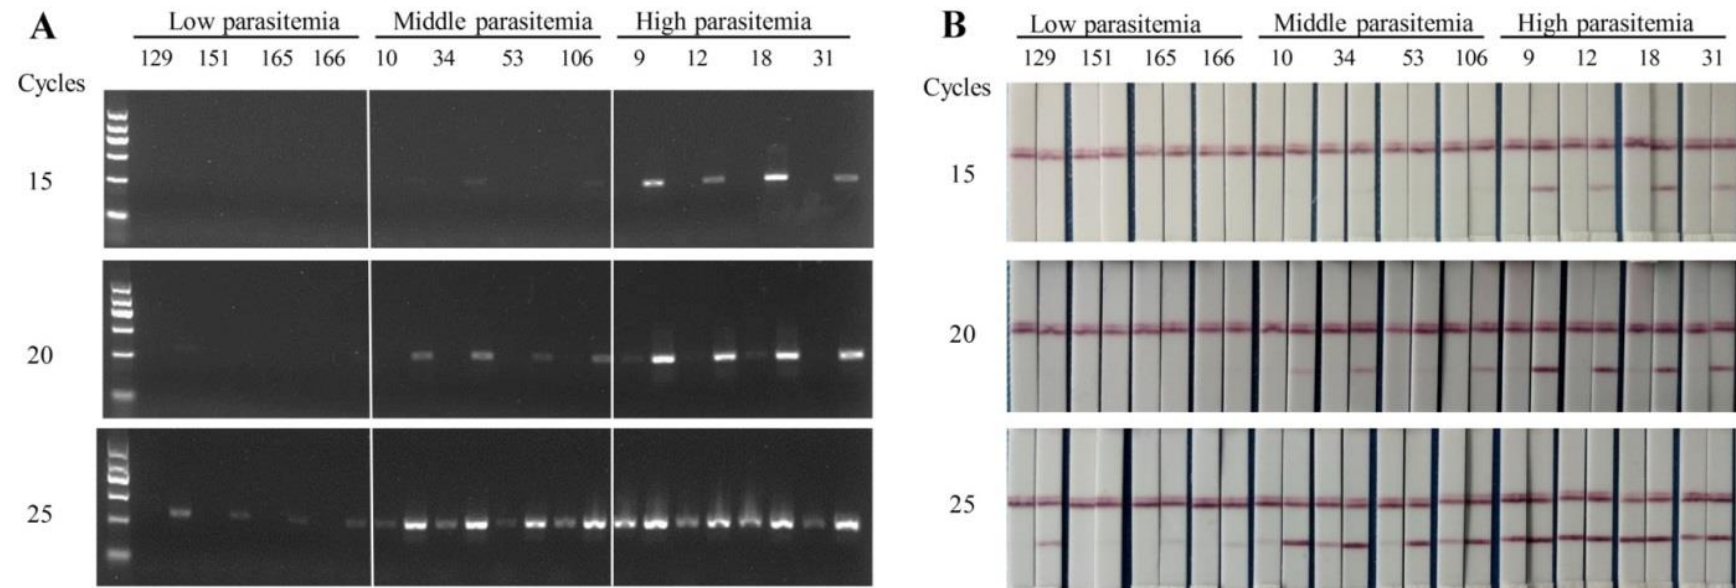

**Figure S5.** Cycle confirmation for AS-PCR at different parasitemia by Pfdhfr S108N. (A) Agarose gel electrophoresis, (B) The AS-PCR-LFA system through visualized interpretation.
